# Supplementary figures and images for: Cabozantinib for patients with advanced hepatocellular carcinoma: a cost-effectiveness analysis
Source: PubMed Central journal article supplement — Ther Adv Gastroenterol. 2019 Sep 23;12:1756284819878304. doi: 10.1177/1756284819878304 (PMC6759721; doi:10.1177/1756284819878304), 2019-09-23

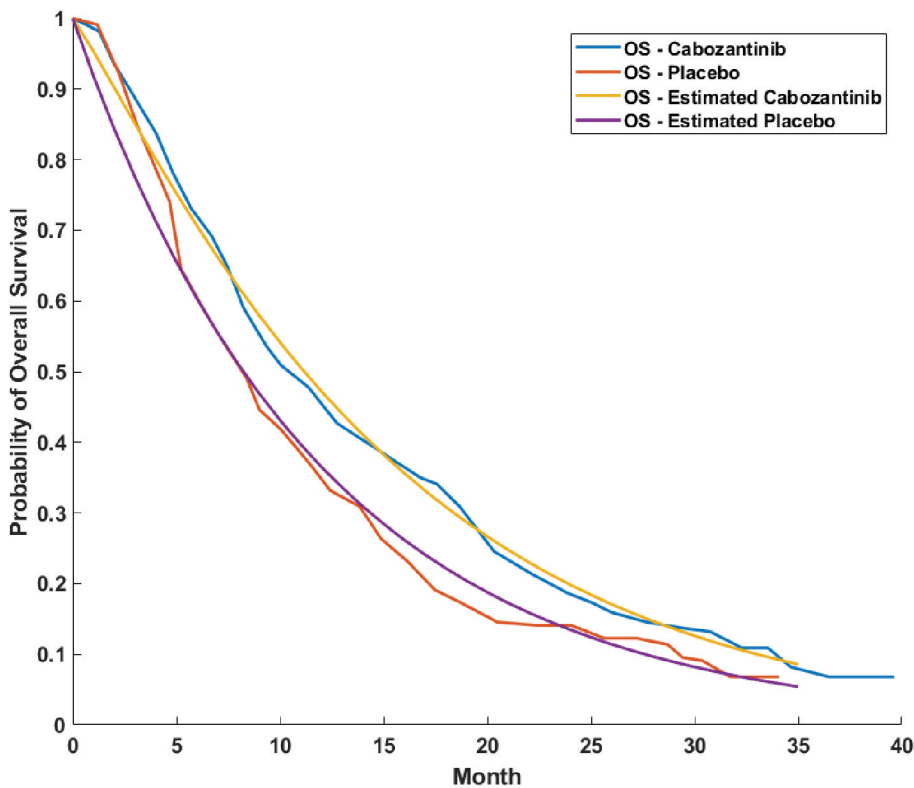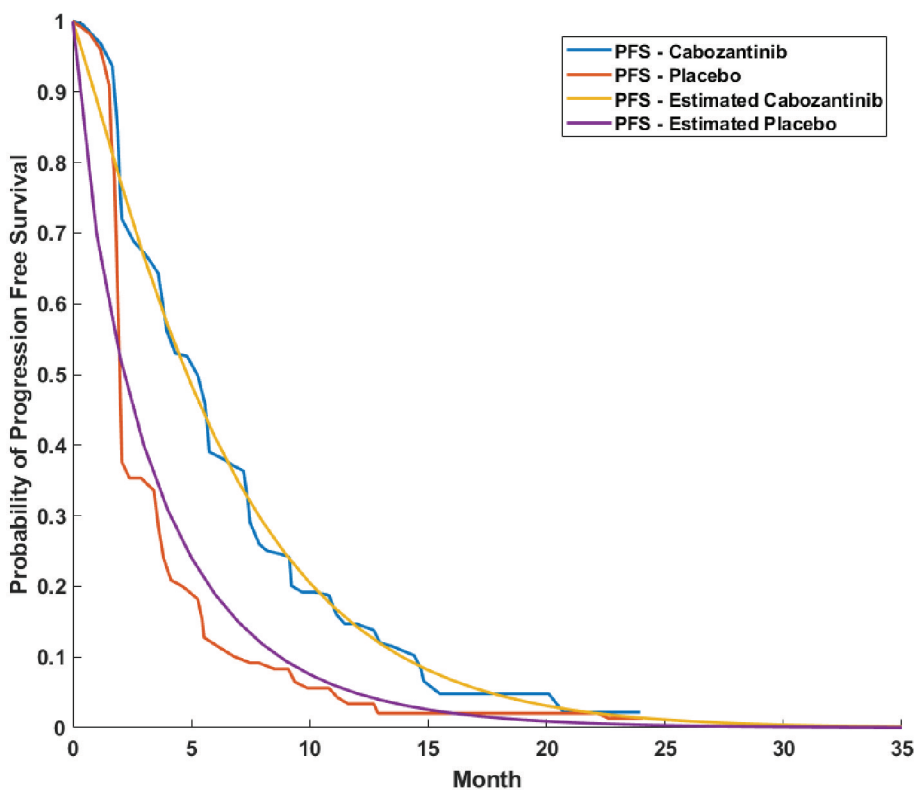

Supp. Fig 1

Supplement: Supp._Fig_1.pdf [file Supp._Fig_1.pdf]
